# Supplementary material for: Sea Buckthorn Flavonoid Extracted by High Hydrostatic Pressure Inhibited IgE-Stimulated Mast Cell Activation through the Mitogen-Activated Protein Kinase Signaling Pathway
Source: MDPI journal article supplement (doi:10.3390/foods13040560), 2024-02-12
Supplement: s1 [file s1]

**Figure S1**

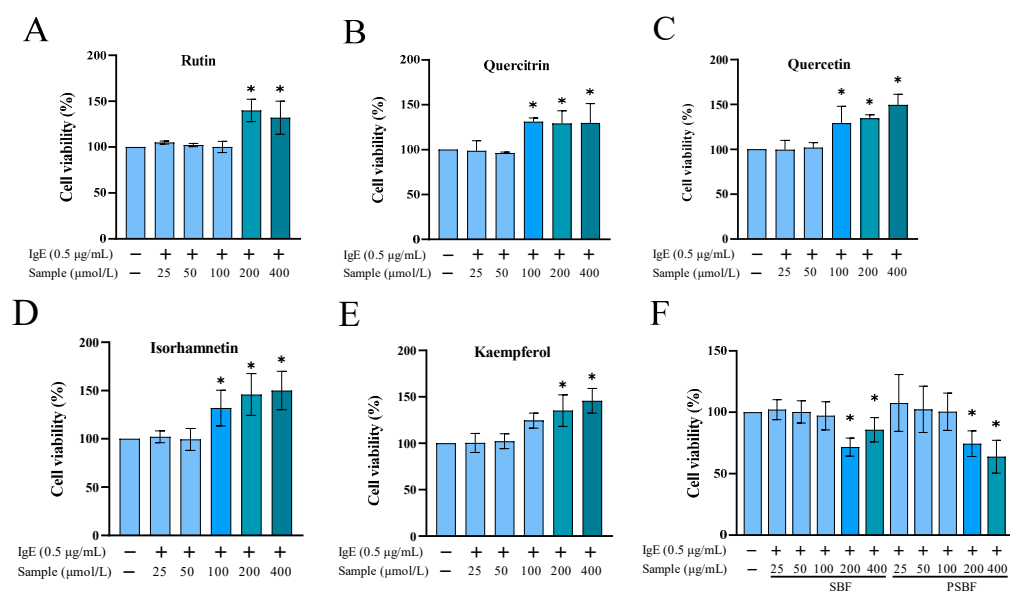

**Figure S1.** Five compounds (A-E) and cytotoxic effect of SBF, PSBF (F) on RBL-2H3 cells. Results are expressed as the mean  $\pm$  SD of three independent experiments. (\* $p < 0.05$ ).

**Table S1** The elution procedure of the mobile phase

| Elution time<br>(min) | Solvent A:<br>acetonitrile (%) | Solvent B: 0.4% phosphoric acid<br>aqueous solution (%) |
|-----------------------|--------------------------------|---------------------------------------------------------|
| 0                     | 10                             | 90                                                      |
| 7                     | 15                             | 85                                                      |
| 10                    | 17                             | 83                                                      |
| 25                    | 17                             | 83                                                      |
| 27                    | 18                             | 82                                                      |
| 31                    | 19                             | 81                                                      |
| 34                    | 19                             | 81                                                      |
| 38                    | 26                             | 74                                                      |
| 42                    | 26                             | 74                                                      |
| 55                    | 50                             | 50                                                      |
| 60                    | 10                             | 90                                                      |

**Table S2** Box-Behnken design and response values for the flavonoid amount of sea buckthorn

|      | A        | B     | Pressure-holding | C             | Ethanol | D      | Liquid-to-solid | Y      | Flavonoid |
|------|----------|-------|------------------|---------------|---------|--------|-----------------|--------|-----------|
| Runs | Pressure | time  |                  | concentration |         | ratio  |                 | amount |           |
|      | (MPa)    | (min) |                  | (%)           |         | (mL/g) |                 | (mg/g) |           |
| 1    | 1        |       | 0                | 1             |         |        | 0               |        | 3.58      |
| 2    | 1        |       | 0                | 0             |         |        | 1               |        | 3.20      |
| 3    | 1        |       | 1                | 0             |         |        | 0               |        | 4.00      |
| 4    | 1        |       | 0                | 0             |         |        | -1              |        | 3.51      |
| 5    | 1        |       | -1               | 0             |         |        | 0               |        | 3.58      |
| 6    | 1        |       | 0                | -1            |         |        | 0               |        | 3.05      |
| 7    | -1       |       | -1               | 0             |         |        | 0               |        | 3.20      |
| 8    | -1       |       | 0                | 0             |         |        | 1               |        | 3.19      |
| 9    | -1       |       | 1                | 0             |         |        | 0               |        | 3.42      |
| 10   | -1       |       | 0                | -1            |         |        | 0               |        | 3.01      |
| 11   | -1       |       | 0                | 1             |         |        | 0               |        | 2.81      |
| 12   | -1       |       | 0                | 0             |         |        | -1              |        | 2.81      |
| 13   | 0        |       | -1               | 0             |         |        | -1              |        | 4.21      |
| 14   | 0        |       | -1               | 0             |         |        | 1               |        | 4.40      |
| 15   | 0        |       | 0                | -1            |         |        | -1              |        | 3.51      |
| 16   | 0        |       | 1                | 0             |         |        | 1               |        | 4.21      |
| 17   | 0        |       | 0                | -1            |         |        | 1               |        | 3.80      |
| 18   | 0        |       | -1               | 1             |         |        | 0               |        | 4.40      |
| 19   | 0        |       | 1                | 1             |         |        | 0               |        | 4.40      |
| 20   | 0        |       | 0                | 1             |         |        | 1               |        | 3.81      |

|    |   |    |    |    |      |
|----|---|----|----|----|------|
| 21 | 0 | 1  | 0  | -1 | 4.39 |
| 22 | 0 | 1  | -1 | 0  | 4.02 |
| 23 | 0 | -1 | -1 | 0  | 3.72 |
| 24 | 0 | 0  | 1  | -1 | 4.01 |
| 25 | 0 | 0  | 0  | 0  | 5.09 |
| 26 | 0 | 0  | 0  | 0  | 4.92 |
| 27 | 0 | 0  | 0  | 0  | 4.88 |
| 28 | 0 | 0  | 0  | 0  | 5.07 |
| 29 | 0 | 0  | 0  | 0  | 4.97 |
